# Supplementary material for: IFN-γ Producing Th1 Cells Induce Different Transcriptional Profiles in Microglia and Astrocytes
Source: Front Cell Neurosci. 2018 Oct 10;12:352. doi: 10.3389/fncel.2018.00352 (PMC6191492; doi:10.3389/fncel.2018.00352)
Supplement: Supplementary Table 2 — Taqman probes used for RT-PCR. [file Table_2.XLSX]

## Sheet: Sheet1
Supplementary Table 2: Taqman probes used for RT-PCR
Gene	Assay
Il6	Mm00446190_m1
Cxcl12	Mm00445553_m1
Cx3cl1	Mm00436454_m1
Bdnf	Mm01334042_m1
Gdnf	Mm00439560_m1
fgf9	Mm00442795_m1
Mertk	Mm00434920_m1
S1pr1	Mm00514644_m1
Myh10	Mm00805131_m1
HPRT	Mm00446968_m1
GAPDH	Mm99999915_g1
